# Supplementary material
Source: PubMed Central journal article supplement (PMC2596240)
Supplement: 0810079105_0810079105SI.pdf [file 0810079105_0810079105SI.pdf]

# Supporting Information

Wootton et al. 10.1073/pnas.0810079105

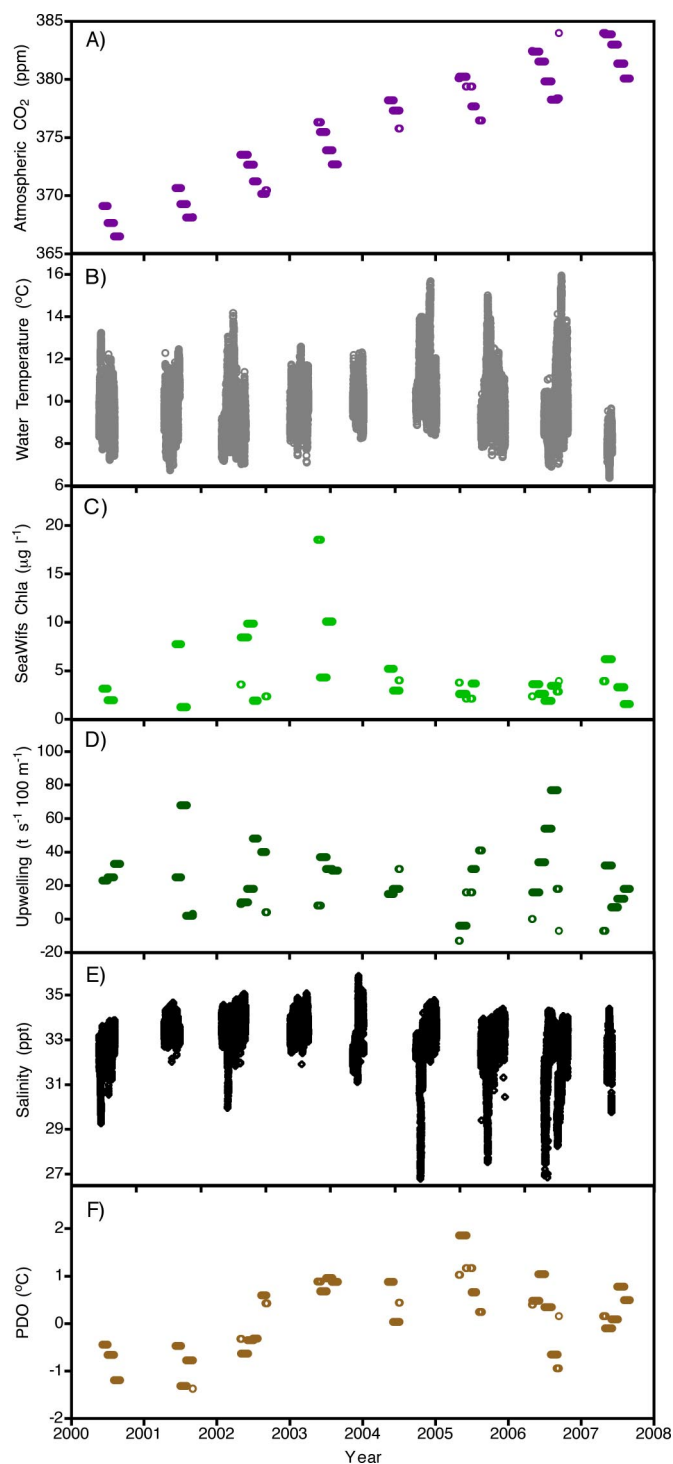

**Fig. S1.** Temporal dynamics of physical/chemical variables used to explore drivers of pH variation through time. (A) Globally averaged monthly atmospheric CO<sub>2</sub> at the ocean surface, (B) Water temperature, (C) Monthly SeaWiFS estimates of chl *a* derived from the adjacent ocean (48°22'–48°26'N; 124°43'–124°47'W), (D) Monthly average upwelling index, (E) Salinity, (F) Monthly average Pacific Decadal Oscillation (PDO) index. Data are restricted to periods of time that pH data were collected.

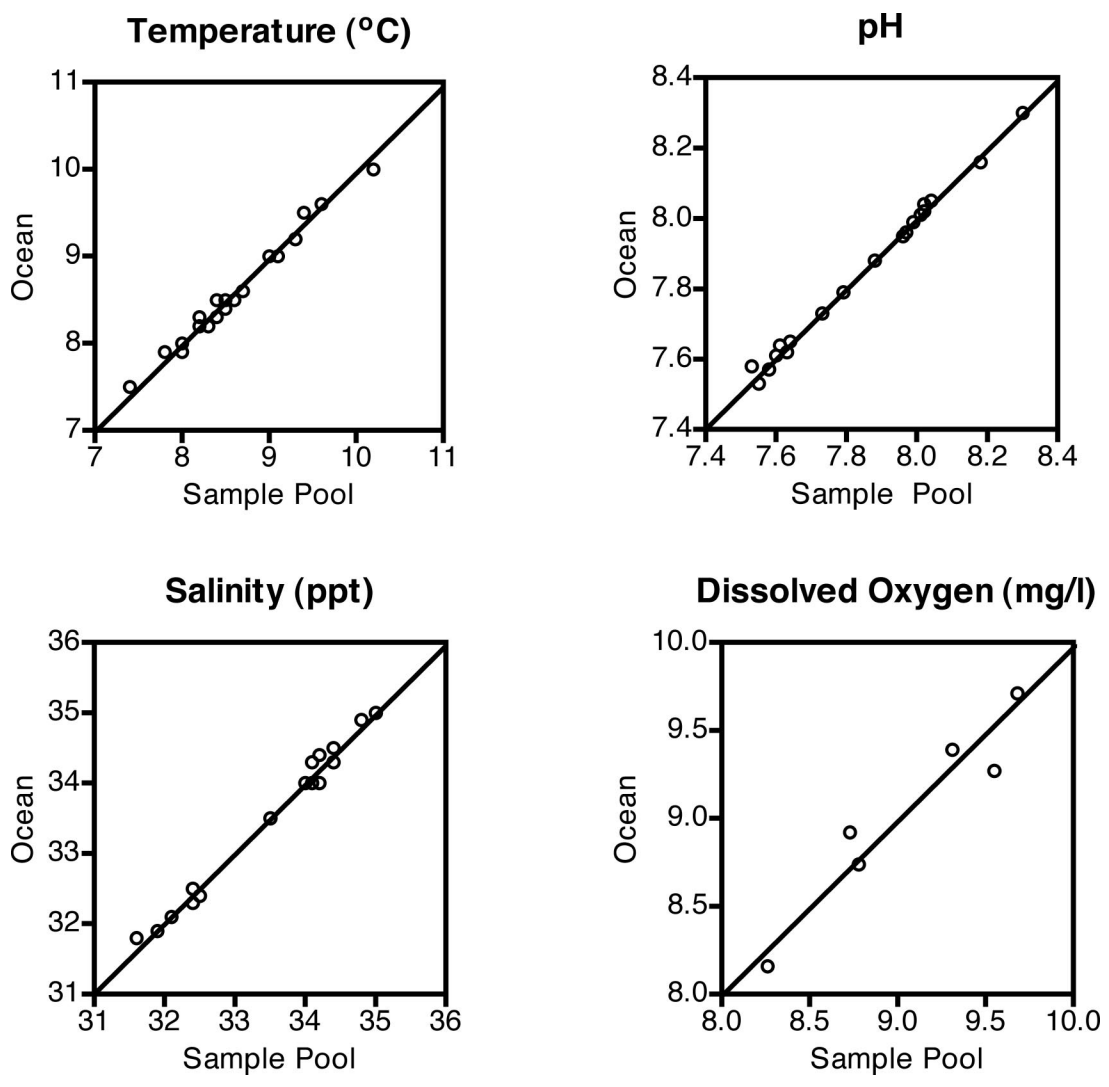

**Fig. S2.** Comparisons of four physical/chemical parameters between the large tide pool containing the data logger and the adjacent open ocean. Measures made after appreciable separation between the two, during low tides (>0.5 h), excluded. No statistically significant differences exist between simultaneous measures of any parameters (paired *t* test, all *P* > 0.45).

**Table S1. Parameter estimates for a model of ocean pH as a function of atmospheric CO<sub>2</sub>, physical, and algal parameters from data rarified to minimize autocorrelation of residuals (AC < 0.1).**

| Parameter | Interpretation                                                         | Mean    | 95% C.I.         |
|-----------|------------------------------------------------------------------------|---------|------------------|
| <i>a</i>  | Constant, pH                                                           | -34.167 | -86.717, 18.383  |
| <i>b</i>  | Change in pH with atmospheric CO <sub>2</sub> , pH/ppm CO <sub>2</sub> | -20.706 | -23.392, -18.019 |
| <i>h</i>  | Half the amplitude of the diurnal productivity oscillation, pH         | -0.112  | -0.144, -0.081   |
| <i>φ</i>  | Phase shift from midnight of diurnal oscillation, h                    | 3.125   | 2.129, 4.121     |
| <i>u</i>  | Effects of upwelling, pH/(metric tons/sec/100 m coastline)             | -0.005  | -0.006, -0.004   |
| <i>c</i>  | Phytoplankton abundance effect, pH-liter/mg chlorophyll                | 0.196   | 0.143, 0.249     |
| <i>τ</i>  | Temperature effect, pH/°C                                              | 0.087   | 0.065, 0.108     |
| <i>d</i>  | Pacific Decadal Oscillation effect, pH/ °C                             | -0.037  | -0.072, -0.003   |
| <i>k</i>  | Estimated Alkalinity, pH/μmol/kg                                       | 30.715  | 14.840, 46.590   |
| <i>s</i>  | Salinity effect, pH/ppt dissolved salt                                 | -0.246  | -0.373, -0.119   |

Estimates derived from nonlinear regression on 18 series of data points that were separated by 900 intervening points in the full data series.
